# Supplementary material for: Spatial and Temporal Assessment of Cerebral Blood Flow in a Novel Piglet Model of Neonatal Arterial Ischemic Stroke
Source: Research Square preprint supplement (doi:10.21203/rs.3.rs-7235675/v1), 2025-09-01
Supplement: Supplementary file 1 [file 53471d4ea19297b7b9e1ae6a.docx]

**SUPPLEMENTAL FIGURES**

Spatial and Temporal Assessment of Cerebral Blood Flow in a Novel Piglet Model of Neonatal Arterial Ischemic Stroke

Translational Stroke Research

Authors: Qihong Wang MD,* Mostafa Abdulrahim MD,* Lisa Young MD,* Larraine Lage LVT, Sanaz Nasoohi PhD, Navid Modiri MD, George Hong MD, Saif Ansari MD, Risheng Xu MD PhD*†*, Emmett Whitaker MD*†*

*†* Co-corresponding authors. Correspondence concerning this manuscript should be addressed to

Emmett E. Whitaker, MD

Department of Anesthesiology and Critical Care Medicine

Johns Hopkins University School of Medicine

Email: [emmett@jhmi.edu](mailto:emmett@jhmi.edu)

Risheng Xu, MD/PhD

Department of Neurosurgery

Johns Hopkins University School of Medicine

Email: rxu4@jhmi.edu

**
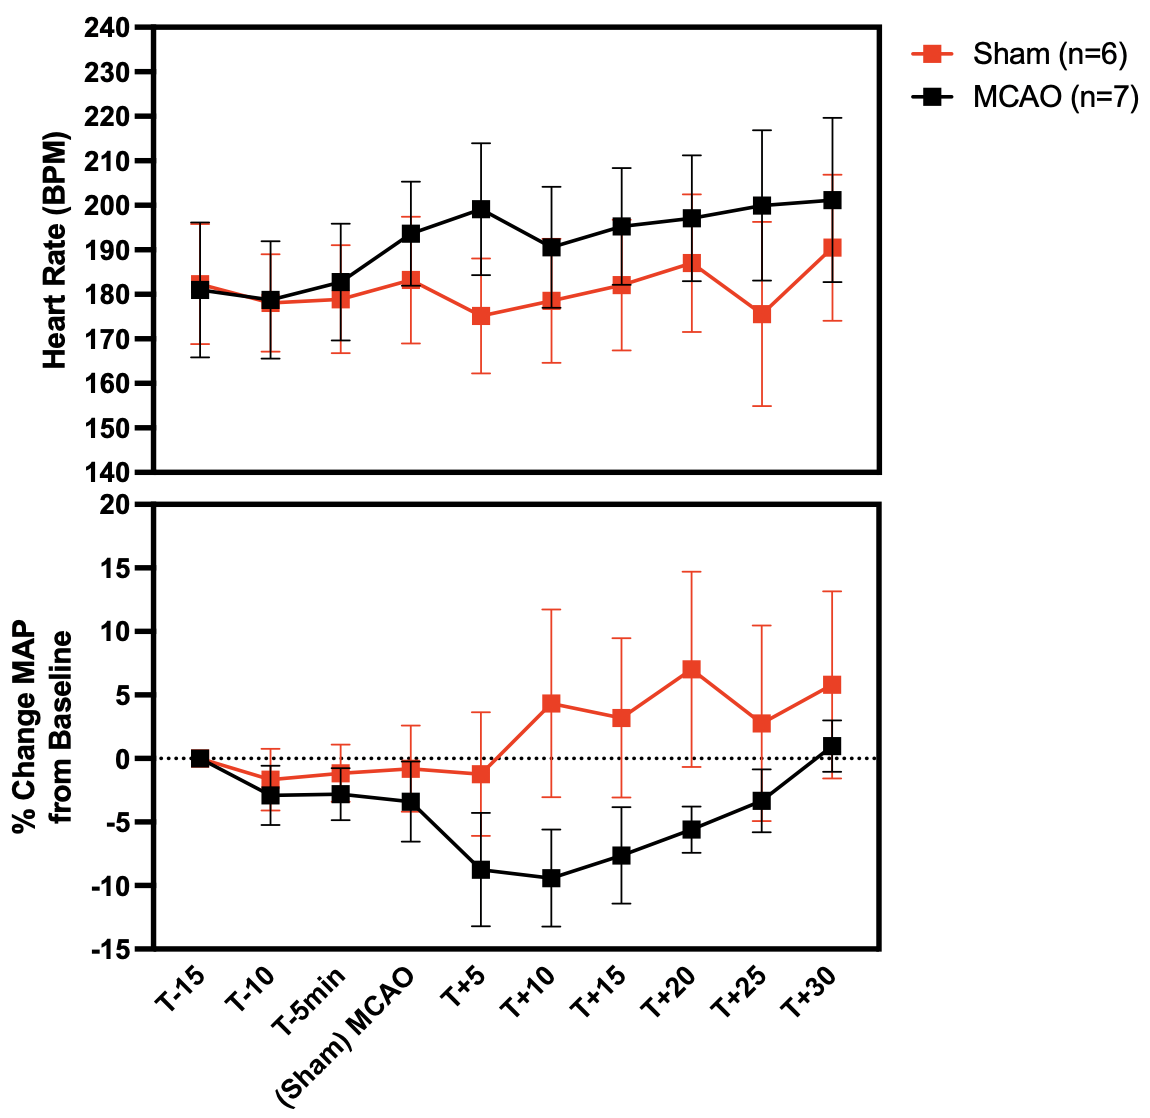
**

**Online Resource 1 Physiological parameters in MCAO (n=7) vs sham piglets (n=6)**

Graphical representation of heart rate and percent change in mean arterial pressure (MAP) from baseline (pre-surgery) in sham and MCAO piglets. There was no significant difference in heart rate or the percent change in MAP from baseline between the two groups prior to and following clip placement, nor within each group at any time point.
